# Supplementary material for: Demonstrating change from a drop-in space soundscape exhibit by using graffiti walls both before and after
Source: Copernicus journal article supplement (doi:10.5194/gc-4-57-2021), 2021-02-18
Supplement: Supplementary file 1 [file gc-4-57-2021-supplement.zip]

Archive with 2 entries (2 files):
- soundscape-coding.xlsx
- gc-4-57-2021-supplement-title-page.pdf
