# Supplementary material for: Demonstrating change from a drop-in space soundscape exhibit by using graffiti walls both before and after
Source: Copernicus journal article supplement (doi:10.5194/gc-4-57-2021), 2021-02-18
Supplement: Supplementary file 1 [file gc-4-57-2021-supplement.zip › gc-4-57-2021-supplement-title-page.pdf]

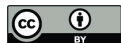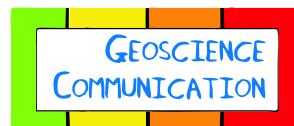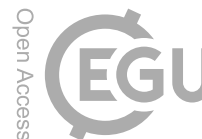

## *Supplement of*

# **Demonstrating change from a drop-in space soundscape exhibit by using graffiti walls both before and after**

**Martin O. Archer et al.**

*Correspondence to:* Martin O. Archer ([m.archer10@imperial.ac.uk](mailto:m.archer10@imperial.ac.uk))

- [gc-4-57-2021-supplement-title-page.pdf](#)
- [soundscape-coding.xlsx](#)

The copyright of individual parts of the supplement might differ from the CC BY 4.0 License.
