# Supplementary material for: Demonstrating change from a drop-in space soundscape exhibit by using graffiti walls both before and after
Source: Copernicus journal article supplement (doi:10.5194/gc-4-57-2021), 2021-02-18
Supplement: Supplementary file 1 [file gc-4-57-2021-supplement.zip › soundscape-coding.xlsx]

## Sheet: Before
		Coder 1					Coder 2					Coder 3
Themes:		Sound	Emptiness	Dynamism	Electricity	Space Objects	Sound	Emptiness	Dynamism	Electricity	Space Objects	Sound	Emptiness	Dynamism	Electricity	Space Objects
Codes:		1 Quiet	1 Empty	1 Slow	1 Electrical	1 Common	1 Quiet	1 Empty	1 Slow	1 Electrical	1 Common	1 Quiet	1 Empty	1 Slow	1 Electrical	1 Common
		2 Loud	2 Full	2 Busy			2 Loud	2 Full	2 Busy			2 Loud	2 Full	2 Busy
Quiet	83	1	1	1			1		1			1	1	1
Nothing	63	1	1	1				1	1			1	1	1
Silent	41	1	1	1			1	1				1	1	1
Loud	32	2	2	2			2					2	2	2
Windy	18	2	2	2			2		2			2		2
Noisy	15	2	2	2			2					2	2	2
Peaceful	8	1	1	1			1		1			1	1	1
Whoosh	8	2		2			2		2				2	2
Echo	6	1	1	1								1	1	2
Calm	6	1	1	1			1	1	1			1	1	1
Air	6	1	2				1	1	1			1	1	2
Static~Noises	5	2		2	1		2		2	1			1	2	1
Rocks~moving	5		2	2		1			2			2	2	2
Crackling	5	2		2	1					1			2	2	1
Empty	5	1	1	1				1				1	1	1
Dark	5		1					1					2	2
Weird	4
Static~noise	3	2		2	1
Crashing	3	2	2	2
Beeping	3	2		2
Buzzing	3	2		2	1
Creepy	3
Aliens	3		2			1
Wavy	3			2
Sudden~Noises	2	2		2
Waterfall	2	2	2	2
Dangerous	2
Scratchy	2	2		2
Banging	2	2		2
Humming	2	2		1	1
Silence	2	1		1
Spooky	2			1
Croaky	2	2		1
SIlent	2	1		1
Light	2		2
Fuzzy	2			2	1
Black	2		1	1
Eerie	2		1	1
Scary	2
Cold	2		1	1
Busy	2		2	2
Deep	2		1	1
Cool	2
Big	2		1
Fun	2
Screaming~children	1	2	2	2
Airplanes~flying	1	2	2	2
Rumbling~noises	1	2		2
Airplane~flying	1	2	2	2
Crash~Boom~Bang	1	2	2	2
Random~crashes	1	2		2
Meteor~showers	1		2	2		1
Metallic~noise	1	2
Humming~sound	1	2		1
Interference	1	2		2	1
Squeaky~Door	1			1
Black~noise	1	2	1
Radioactive	1				1
Earthquakes	1			2
Low~thunder	1	2		2
White~noise	1	2		2	1
Ants~moving	1		2	2
Heavy~Metal	1	2		2
Loud~Noises	1	2		2
Under~Water	1	1		1
Centrifuge	1			2
Mysterious	1
Screeching	1	2
Snow~storm	1	2		2
Few~noises	1	1
Quiet~buzz	1	1		1	1
Space~Race	1					1
Black~Hole	1		2			1
Something	1
Confusing	1
Deafening	1	2
Whooshing	1	2		2
Cracking	1	2		2
Bubbling	1	2		2
Ethereal	1	1	1	1
Deep~sea	1	1		1
Rustling	1	2		2
Momotone	1	2		1
Swishing	1	2		2
Tranquil	1	1	1	1
Machine	1
Glitchy	1			2	1
Earache	1	2
Crackly	1	2		2	1
Washing	1			2
Ringing	1	2
Hissing	1	2
Thunder	1	2		2
Jumping	1			2
Strange	1
Violent	1		2	2
Muffled	1	1		1
Popping	1	2		2
Mystery	1
Endless	1		1
Flowing	1		2	2
Screech	1
Dum~dum	1			2
Static	1	2		2	1
Lonely	1		1	1
Sci-fi	1					1
Quasar	1		2
Gloomy	1		1	1
Blurry	1		1	1
Freaky	1
Bouncy	1			2
Lights	1		2
Water	1
Abyss	1		1	1
Clear	1		1	1
Crash	1		2	2
Music	1	2		2
Boink	1			2
Soft	1	1		1
Nice	1
Cats	1
Warm	1		2
Slow	1			1
Wind	1	2	2	2
Boom	1	2		2
Blow	1		2	2
Hole	1		1	1
Bang	1	2		2
Dog	1
Cow	1
Hot	1		2
Picture 1	1					1
Picture 2	1			2
Picture 3	1		1			1
Picture 4	1		1			1
Picture 5	1					1
Picture 6	1					1
Picture 7	1		1			1
Picture 8	1		1			1
Picture 9	1					1
Picture 10	1					1
Picture 11	1	2
Picture 12	1			2		1
Picture 13	1	2		2
Picture 14	1			2		1
Picture 15	1			2		1
Picture 16	1	2		2		1
Picture 17	1
Picture 18	1		2	2
Picture 19	1					1
Picture 20	1
Picture 21	1
Picture 22	1	2				1
Picture 23	1	1	1			1
Picture 24	1			2		1
Picture 25	1					1
Picture 26	1					1
Picture 27	1
Picture 28	1			2
Picture 29	1		2
Picture 30	1
Picture 31	1	2		2		1
Picture 32	1					1
Picture 33	1		2	2
Picture 34	1					1
Picture 35	1					1
Picture 36	1			2		1
Picture 37	1					1
Picture 38	1			2		1
Picture 39	1		1			1
Picture 40	1		1			1
Picture 41	1	2	2
Picture 42	1					1
Picture 43	1		1			1
Picture 44	1		1			1
Picture 45	1	1				1
Picture 46	1					1
Picture 47	1	2	2
Picture 48	1			2
Picture 49	1
Picture 50	1					1
Picture 51	1					1
Picture 52	1					1
Picture 53	1			2		1
Picture 54	1					1
Picture 55	1	1	1			1
Picture 56	1			2		1
Picture 57	1			2
Picture 58	1					1
Picture 59	1					1
Picture 60	1		1			1
Picture 61	1					1
Picture 62	1					1
Picture 63	1	2
Picture 64	1	2
Picture 65	1
Picture 66	1	1	1
Picture 67	1		1
Picture 68	1
Picture 69	1
Picture 70	1
Picture 71	1

## Sheet: After
		Coder 1					Coder 2					Coder 3
Themes:		Sound	Emptiness	Dynamism	Electricity	Space Objects	Sound	Emptiness	Dynamism	Electricity	Space Objects	Sound	Emptiness	Dynamism	Electricity	Space Objects
Codes:		1 Quiet	1 Empty	1 Slow	1 Electrical	1 Common	1 Quiet	1 Empty	1 Slow	1 Electrical	1 Common	1 Quiet	1 Empty	1 Slow	1 Electrical	1 Common
		2 Loud	2 Full	2 Busy			2 Loud	2 Full	2 Busy			2 Loud	2 Full	2 Busy
Crackling	82	2		2	1		2			1			2	2	1
Scratchy	18	2		2			2		2			1	2	2
Electricity	12				1				2	1		2			1
Noisy	12	2	2	2			2	2	2			2	2	2
Windy	12	2	2	2			2		2			2		2
Static	11	2		2	1		2		2	1			1	2	1
Fire	10	2	2	2			2		2
Crunchy	9	2		2			2		2					2
Popping	9	2		2			2		2	1			2	2
Popping~candy	8	2		2			2		2				2	2
Electric	8				1				2	1		2			1
Loud	8	2					2					2	2	2
Buzzing	6	2		2	1		2		2	1			2	2	1
Glitchy	6			2	1				2	1				2	1
Weird	6
Fireworks	5	2	2	2
Crackles	5	2		2
Squeaky	5	2		2
Rocks~moving	4		2	2		1
TV~static	4	2		2	1
Squeaking	4	2		2
Rattling	4	2	2	2
Quiet	4	1	1	1
Interference	3	2		2	1
High~pitched	3	2
Whistling	3	2
Popcorn	3	2
Creepy	3
Aliens	3					1
Snap	3	2		2
People~talking	2	2	2	2
Pistols~firing	2	2		2
Robot~breaking	2	2		2
White~noise	2	2		2	1
Scratching	2	2		2
Whooshing	2	2		2
Crumbly	2	2		2
Insects	2			2
Falling	2			2
Creaky	2	2		1
Lazers	2			2
Fuzzy	2			2	1
Wavy	2	2		2
Electricity~crackles	1	2		2	1
Electrostatic~Noises	1	2	2	2	1
Electricity~cracking	1	2	2	2	1
Radio~interference	1	2		2	1
Starships~battling	1			2		1
Electrical~Charges	1				1
Chickens~and~pigs	1
Crackling~Noises	1	2		2
Electric~noises	1	2			1
Marbles~rolling	1	2	2
Electric~sparks	1	2		2	1
Silent~ticking	1	1		2
Radiohead~song	1	2		2
Electric~Waves	1	2		2	1
Cables~fizzing	1	2		2	1
Water~dripping	1	2		2
High~speed~air	1		2	2
Flicking~paint	1			2
Bursting~wires	1			2	1
Cricket~noises	1	2
Plane~breaking	1	2		2
Broken~signal	1	2
Electric~wind	1		2	2	1
Rocks~falling	1	2		2		1
Robot~moving	1			2
Eggs~cooking	1	2		2
Intermission	1
Intermittent	1	2		2
Grasshoppers	1	2
Radio~tuning	1	2
Static~noise	1	2		2	1
Fast~moving	1			2
Laser~beams	1			2	1
Interesting	1
Pop~rockets	1	2		2		1
Mysterious	1
Unexpected	1
Space~ship	1			2		1
Screeching	1	2		2
Laser~beam	1			2	1
Snow~storm	1		2	2
Bass~drop	1	2
Fat~mouse	1
Glitching	1			2	1
Screaming	1	2
Hailstorm	1	2	2	2
Something	1
Crunching	1	2		2
Lightning	1	2		2
TV~Static	1	2		2	1
Screechy	1	2
Crashing	1	2		2
Whistles	1	2
Sizzling	1	2
Slurping	1	2	2
Floating	1			1
Soothing	1	1		1
Rustling	1	2	2	2
Lighting	1
Dripping	1			1
Crackly	1	2		2
Whisper	1	1
Fizzing	1	2	2	2
Nothing	1	1	1	1
Dolphin	1
Hissing	1	2
Strange	1
Thunder	1	2		2
Sparkly	1		2
Random	1
Whispy	1	1		2
Squeak	1	2
Old~TV	1	2		2	1
Floppy	1
Angry	1
Eerie	1
Alien	1					1
Rocks	1					1
Crash	1	2		2
Water	1		2
Rocky	1		2			1
Metal	1				1
Messy	1		2	2
Slime	1
Rough	1
Cool	1
Busy	1			2
Cold	1		1	1
Calm	1	1	1	1
Wind	1	2	2	2
Grrr	1
Rain	1	2	2	2
Picture 1	1	2		2	1
Picture 2	1					1
Picture 3	1			2	1
Picture 4	1			2
Picture 5	1		2	2		1
Picture 6	1			2		1
Picture 7	1			2
Picture 8	1	2
Picture 9	1	2		2
Picture 10	1			2		1
Picture 11	1				1
Picture 12	1
Picture 13	1
Picture 14	1			2
Picture 15	1					1
Picture 16	1			2
Picture 17	1					1
Picture 18	1			2
Picture 19	1					1
Picture 20	1	2
Picture 21	1	2		2
Picture 22	1	2				1
Picture 23	1			2		1
Picture 24	1			2		1
Picture 25	1			2
Picture 26	1	2		2		1
Picture 27	1	2		2	1
Picture 28	1	2	2	2
Picture 29	1	2	2	2
Picture 30	1	2	2	2		1
Picture 31	1		2			1
Picture 32	1	2		2
Picture 33	1			2		1
Picture 34	1		2	2	1
Picture 35	1		2	2	1
Picture 36	1
Picture 37	1
Picture 38	1
Picture 39	1
Picture 40	1
Picture 41	1
Picture 42	1	2		2
Picture 43	1		2	2		1
Picture 44	1		2			1
Picture 45	1			2	1
Picture 46	1		2			1
Picture 47	1	2	2	2
Picture 48	1			2		1
Picture 49	1	2		2	1
Picture 50	1	2	2	2
Picture 51	1
Picture 52	1
Picture 53	1
Picture 54	1		2	2
Picture 55	1		2	2

## Sheet: Response Counts
		Before			After
		n	p	s	n	p	s
Sound	1 Quiet	234	0.437383	0.0214467	10	0.0224215	0.00701037
	2 Loud	150	0.280374	0.0194198	305	0.683857	0.022017
	Total	384	0.717757	0.0194591	315	0.706278	0.0215669
Emptiness	1 Empty	250	0.46729	0.0215706	7	0.0156951	0.00588544
	2 Full	109	0.203738	0.0174136	79	0.17713	0.0180777
	Total	359	0.671028	0.0203129	86	0.192825	0.0186809
Dynamism	1 Slow	247	0.461682	0.0215533	12	0.0269058	0.00766184
	2 Busy	171	0.319626	0.0201613	323	0.724215	0.0211617
	Total	418	0.781308	0.0178711	335	0.751121	0.020473
Electricity	1 Electrical	27	0.0504673	0.00946418	162	0.363229	0.0227727
Space Objects	1 Common	57	0.106542	0.0133389	32	0.0717489	0.01222
Total responses		535			446

## Sheet: Code Counts
		Coder 1		Coder 2		Coder 3
		Before	After	Before	After	Before	After
Sound	1 Quiet	8	0	5	0	8	1
	2 Loud	6	11	5	11	4	5
	None	2	4	6	4	4	9
Emptiness	1 Empty	8	0	6	0	9	1
	2 Full	5	3	0	1	6	7
	None	3	12	10	14	1	7
Dynamism	1 Slow	7	0	5	0	6	0
	2 Busy	7	11	4	12	10	11
	None	2	4	7	3	0	4
Electricity	1 Electrical	2	6	2	7	2	6
	None	14	9	14	8	14	9
